# Supplementary material for: Probing Reactivity with External Forces: The Case of Nitroacetamides in Water
Source: MDPI journal article supplement (doi:10.3390/molecules29010009), 2023-12-19

# **Supplementary Materials**

## **Probing Reactivity with External Forces: The Case of Nitroacetamides in Water**

**Giovanni La Penna and Fabrizio Machetti**

### **Table of Contents**

<sup>1</sup>H and <sup>13</sup>C NMR Spectra Figures S1–S2.

**Figure S1.**  $^1\text{H}$  NMR (bottom) and  $^{13}\text{C}$  NMR (top) spectra in  $\text{CDCl}_3$  of compound **1**.

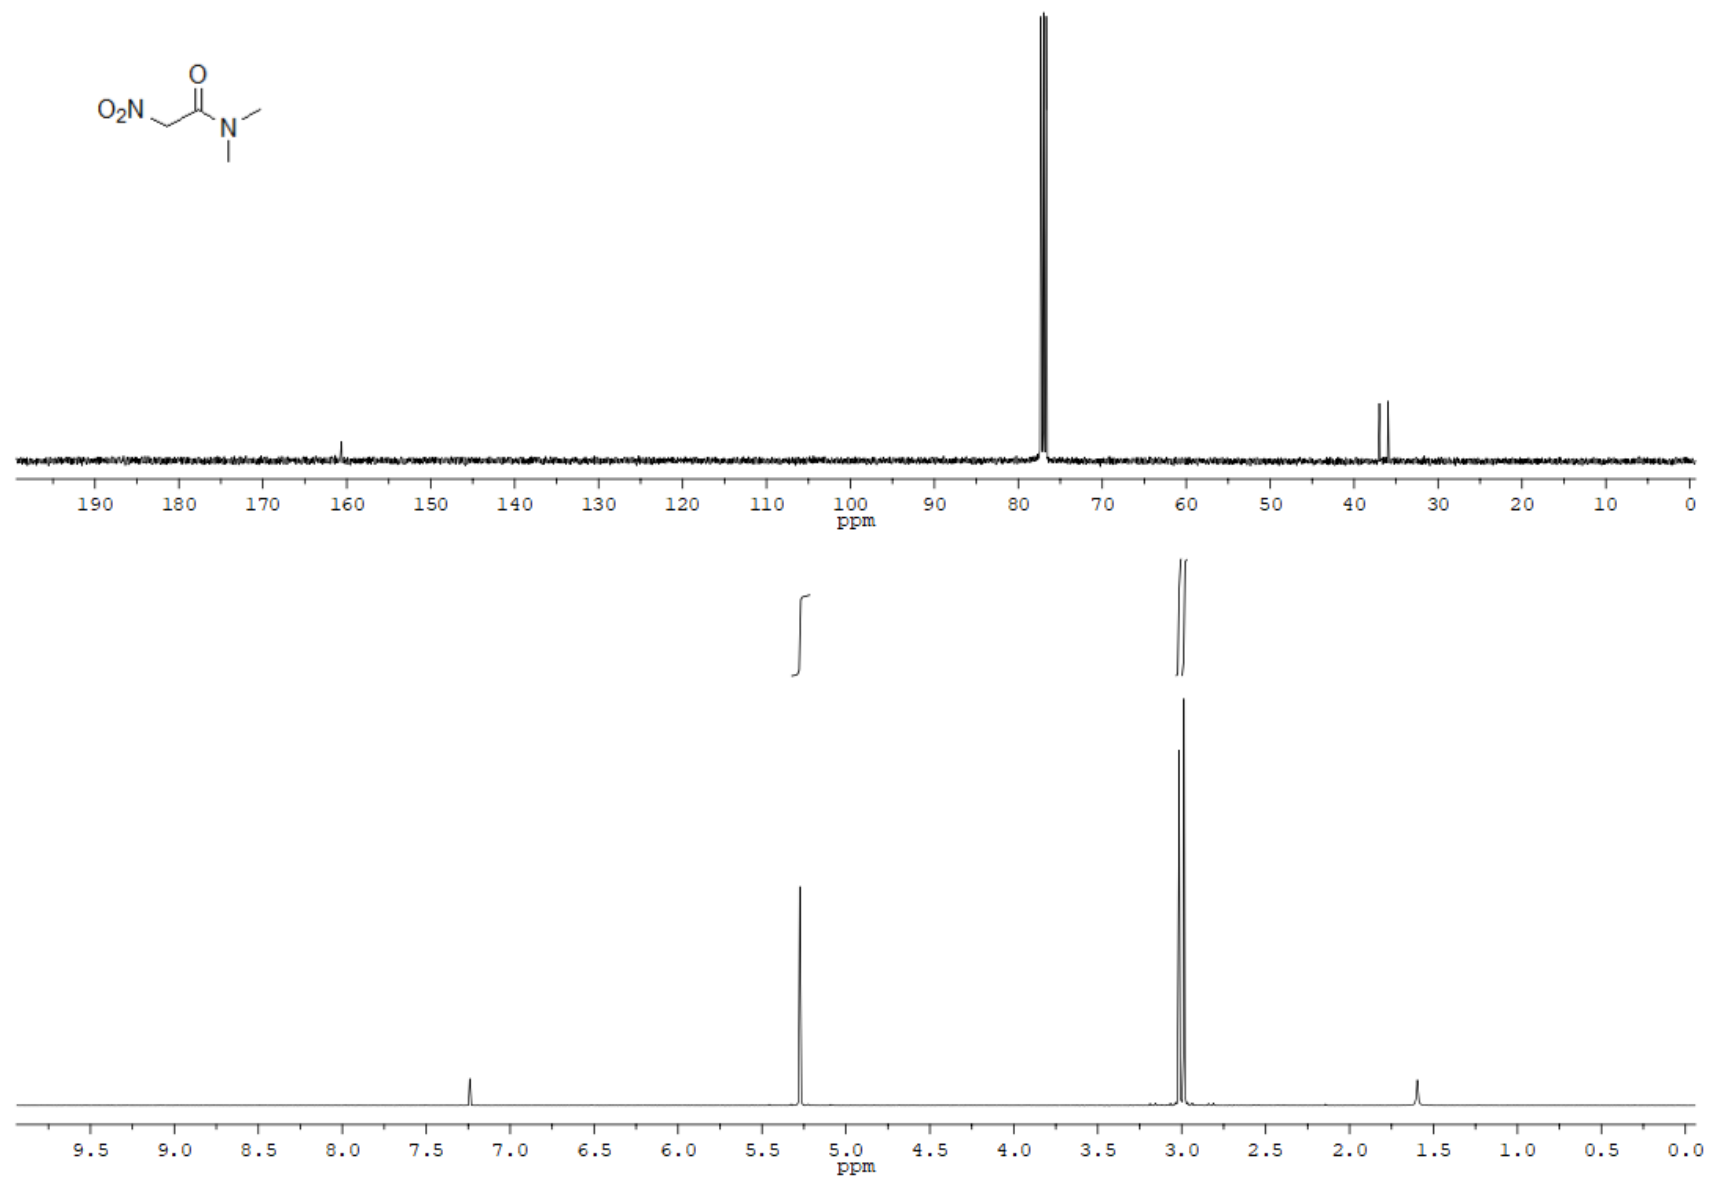

**Figure S2.**  $^1\text{H}$  NMR (bottom) and  $^{13}\text{C}$  NMR (top with expanded view of  $\text{CH}_2\text{NO}_2$  carbon) spectra in  $\text{CDCl}_3$  of compound **3**.

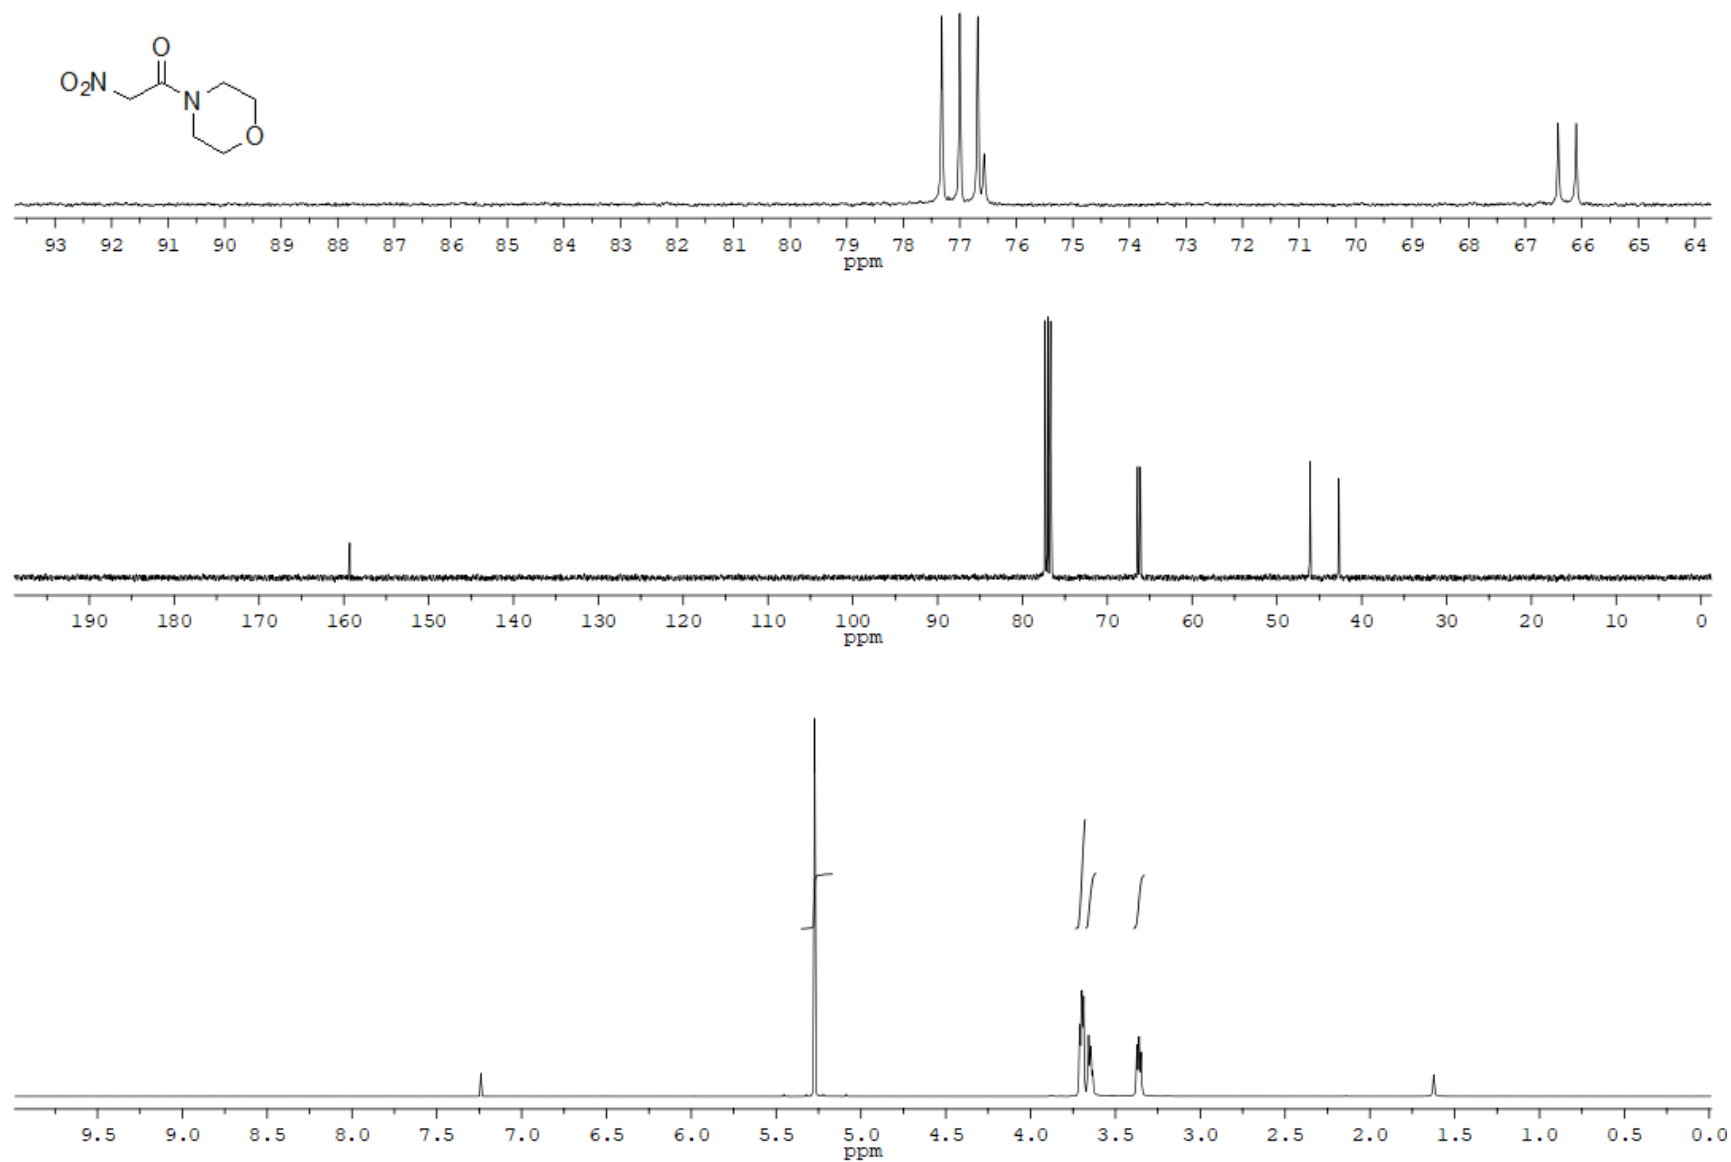

Supplement: s1 [file s1]
